# Supplementary material for: Vitamin D supplementation to improve pregnancy and perinatal outcomes: an overview of 42 systematic reviews
Source: PubMed Central journal article supplement — BMJ Open. 2020 Jan 20;10(1):e032626. doi: 10.1136/bmjopen-2019-032626 (PMC7044866; doi:10.1136/bmjopen-2019-032626), 2020-01-20
Supplement: bmjopen-2019-032626supp001.pdf [file bmjopen-2019-032626supp001.pdf]

**Supplementary Table 1: Literature search strategy**

**Database:** Ovid MEDLINE(R) Epub Ahead of Print, In-Process & Other Non-Indexed Citations, Ovid MEDLINE(R) Daily and Ovid MEDLINE(R) 1946 to Present

**Date conducted:** 2 October 2017

**Strategy:**

- 1 Preconception Care/ (1917)
- 2 exp Pregnancy/ (855216)
- 3 exp Pregnancy Complications/ (405775)
- 4 Pregnant Women/ (6515)
- 5 Prenatal Care/ (24637)
- 6 Prenatal Diagnosis/ (35834)
- 7 (antenatal\* or pre-natal\* or prenatal\*).tw,kf. (120088)
- 8 (expect\* adj2 (female? or mother? or wom#n)).tw,kf. (3728)
- 9 ((1\* or first\*) adj2 (tri-mester\* or trimester\*)).tw,kf. (23473)
- 10 (pre-conception\* or preconception\*).tw,kf. (4573)
- 11 pregnan\*.tw,kf. (477757)
- 12 or/1-11 [Combined MeSH & text words for pregnancy] (1016791)
- 13 exp Vitamin D/ (54287)
- 14 Vitamin D Deficiency/ (13412)
- 15 calcidiol\*.tw,kf. (397)
- 16 calciol\*.tw,kf. (20)
- 17 calcifediol\*.tw,kf. (128)
- 18 cholecalciferol\*.tw,kf. (2377)
- 19 hydroxycholecalciferol\*.tw,kf. (1377)
- 20 hydroxyvitamin D\*.tw,kf. (12499)
- 21 (vitamin D or vitamin D3 or vitamin D\$2).tw,kf. (60203)
- 22 or/13-21 [Combined MeSH & text words for vitamin D] (79566)
- 23 and/12,22 [Combined concepts for pregnancy & vitamin D] (4365)
- 24 meta-analysis.pt. (87537)
- 25 meta-analysis/ or systematic review/ or meta-analysis as topic/ or "meta analysis (topic)"/ or "systematic review (topic)"/ or exp technology assessment, biomedical/ (113240)
- 26 ((systematic\* adj3 (review\* or overview\*)) or (methodologic\* adj3 (review\* or overview\*))).ti,ab,kf,kw. (127445)
- 27 ((quantitative adj3 (review\* or overview\* or synthes\*)) or (research adj3 (integrati\* or overview\*))).ti,ab,kf,kw. (8559)
- 28 ((integrative adj3 (review\* or overview\*)) or (collaborative adj3 (review\* or overview\*)) or (pool\* adj3 analy\*)).ti,ab,kf,kw. (19993)
- 29 (data synthes\* or data extraction\* or data abstraction\*).ti,ab,kf,kw. (20992)
- 30 (handsearch\* or hand search\*).ti,ab,kf,kw. (7877)
- 31 (mantel haenszel or peto or der simonian or dersimonian or fixed effect\* or latin square\*).ti,ab,kf,kw. (21571)
- 32 (met analy\* or metanaly\* or technology assessment\* or HTA or HTAs or technology overview\* or technology appraisal\*).ti,ab,kf,kw. (7548)
- 33 (meta regression\* or metaregression\*).ti,ab,kf,kw. (5904)

34 (meta-analy\* or metaanaly\* or systematic review\* or biomedical technology assessment\* or bio-medical technology assessment\*).mp,hw. (217154)  
 35 (medline or cochrane or pubmed or medlars or embase or cinahl).ti,ab,hw. (161733)  
 36 (cochrane or (health adj2 technology assessment) or evidence report).jw. (18083)  
 37 (meta-analysis or systematic review).mp. [sic – changed .md. to .mp] (200672)  
 38 (comparative adj3 (efficacy or effectiveness)).ti,ab,kf,kw. (10906)  
 39 (outcomes research or relative effectiveness).ti,ab,kf,kw. (7938)  
 40 ((indirect or indirect treatment or mixed-treatment) adj comparison\*).ti,ab,kf,kw. (1649)  
 41 or/24-40 [CADTH SR search filter | Retrieved from:  
<https://www.cadth.ca/resources/finding-evidence/strings-attached-cadths-database-search-filters#syst>] (358374)  
 42 and/23,41 [SR filter applied] (187)  
 43 remove duplicates from 42 (164)

Database: Wiley Cochrane Library

Date conducted: 2 October 2017

Strategy:

#1 [mh ^"Preconception Care"] 103  
 #2 [mh Pregnancy] 5760  
 #3 [mh "Pregnancy Complications"] 9364  
 #4 [mh ^"Pregnant Women"] 156  
 #5 [mh ^"Prenatal Care"] 1332  
 #6 [mh ^"Prenatal Diagnosis"] 380  
 #7 (antenatal\* or "pre-natal\*" or prenatal):ti,ab,kw 6295  
 #8 (expect\* near/2 (female? or mother? or wom?n)):ti,ab,kw 243  
 #9 ((1\* or first\*) near/2 ("tri-mester\*" or trimester\*)):ti,ab,kw 4141  
 #10 ("pre-conception\*" or preconception\*):ti,ab,kw 307  
 #11 pregnan\*:ti,ab,kw 36386  
 #12 {or #1-#11} 38579  
 #13 [mh "Vitamin D"] 2941  
 #14 [mh ^"Vitamin D Deficiency"] 617  
 #15 calcidiol\*:ti,ab,kw 46  
 #16 calciol\*:ti,ab,kw 1  
 #17 calcifediol\*:ti,ab,kw 475  
 #18 cholecalciferol\*:ti,ab,kw 1208  
 #19 hydroxycholecalciferol\*:ti,ab,kw 338  
 #20 "hydroxyvitamin D\*":ti,ab,kw 1931  
 #21 ("vitamin D" or "vitamin D3" or "vitamin D?"):ti,ab,kw 6774  
 #22 {or #13-#21} 7581  
 #23 #11 and #22 354  
 #24 #11 and #22 in Cochrane Reviews (Reviews and Protocols), Other Reviews and Technology Assessments 14
