# Supplementary material for: Vitamin D supplementation to improve pregnancy and perinatal outcomes: an overview of 42 systematic reviews
Source: PubMed Central journal article supplement — BMJ Open. 2020 Jan 20;10(1):e032626. doi: 10.1136/bmjopen-2019-032626 (PMC7044866; doi:10.1136/bmjopen-2019-032626), 2020-01-20
Supplement: bmjopen-2019-032626supp003.pdf [file bmjopen-2019-032626supp003.pdf]

**Supplementary Table 3: Description of included systematic reviews**

| First Author<br>Country<br>Last assessed up-to-date | Number of studies<br>Sample size (range) | Population                                                                                             | Intervention<br>Doses in IU                                                                                                                                                                                                                                                                                                                                                 | Comparison                                                                                                                                                                                                                                 | Outcomes for which data are reported                                                                                                                                                                                                                                                                                                                                                                                                                                                                                                                                                                        |
|-----------------------------------------------------|------------------------------------------|--------------------------------------------------------------------------------------------------------|-----------------------------------------------------------------------------------------------------------------------------------------------------------------------------------------------------------------------------------------------------------------------------------------------------------------------------------------------------------------------------|--------------------------------------------------------------------------------------------------------------------------------------------------------------------------------------------------------------------------------------------|-------------------------------------------------------------------------------------------------------------------------------------------------------------------------------------------------------------------------------------------------------------------------------------------------------------------------------------------------------------------------------------------------------------------------------------------------------------------------------------------------------------------------------------------------------------------------------------------------------------|
| Bi<br>Canada<br>May 2018                            | 24 RCTs<br>5,405 (30 – 965)              | Population was healthy, pregnant women without prior vitamin D supplementation of more than 400 IU/d   | Vitamin D in the form of cholecalciferol in 22 RCTs and in the form of ergocalciferol in 3 RCTs<br><br>daily doses: 800 - 5000; weekly doses 35000 or 50000; fortnightly dose 50000; monthly dose 60000; bimonthly dose 60000; and bolus doses 60000 - 200 000                                                                                                              | Placebo, no intervention or other dose of vitamin D                                                                                                                                                                                        | Primary: small for gestational age (indicated by birthweight less than the 10th percentile for gestational age, fetal or neonatal mortality)<br><br>Secondary: neonatal (25[OH]D) levels, congenital malformation, admission to a neonatal intensive care unit (NICU), Apgar scores, neonatal calcium levels, birth weight, low birth weight, gestational age, preterm birth, infant growth, asthma, respiratory infection, eczema, and allergy                                                                                                                                                             |
| Khaing<br>Thailand<br>October 2017                  | 19 RCTs<br>28,000 (30 – 9,178)           | Pregnant women of any gestational age                                                                  | Calcium, vitamin D, combined calcium and vitamin D<br><br>Vitamin D vs. placebo = 3; Calcium + vitamin D vs. calcium = 1<br>Vitamin D2 or D3, alone or in combination provided the co-intervention is similar in at least one other trial arm<br><br>Daily doses: 400 – 5000; weekly doses: 714 – 7543; monthly doses: 1645 – 3289; bolus doses: 60000 – 120000 (60000 x 2) | Placebo, a standard supplementation (e.g., folic acid), or no supplementation<br><br>Placebo, no vitamin D, or vitamin D up to 600 IU/day (or a less frequent dose that would be about equivalent to 600 IU/day—for example, 4200 IU/week) | Primary: preeclampsia, eclampsia, proteinuria (dipstick urine 2+ or '300 mg/24 h), end-organ dysfunction, or utero-placental dysfunction after 20 weeks of gestation<br><br>Primary: 25 OHD, preeclampsia, gestational diabetes, gestational hypertension, intra-uterine death/stillbirth, c-section, weight gain, preterm labor, death, adverse events, hospitalizations, birth weight, birth length, head circumference, low birth weight, small for gestational age, gestational age at birth, congenital malformations, neonatal death, respiratory infection, asthma, bone mineral content and density |
| Roth<br>Canada<br>September 2017                    | 43 RCTs<br>8,406 (16 – 1,134)            | Participants were pregnant at enrolment or enrolled before pregnancy and then followed-up in pregnancy |                                                                                                                                                                                                                                                                                                                                                                             |                                                                                                                                                                                                                                            |                                                                                                                                                                                                                                                                                                                                                                                                                                                                                                                                                                                                             |

| First Author<br>Country<br>Last assessed up-to-date               | Number of studies<br>Sample size (range)                                                                                                   | Population                                                                             | Intervention<br>Doses in IU                                                                                                                                                                                             | Comparison                                                                                   | Outcomes for which data are reported                                                                                                                                                                                                                                                                                                                        |
|-------------------------------------------------------------------|--------------------------------------------------------------------------------------------------------------------------------------------|----------------------------------------------------------------------------------------|-------------------------------------------------------------------------------------------------------------------------------------------------------------------------------------------------------------------------|----------------------------------------------------------------------------------------------|-------------------------------------------------------------------------------------------------------------------------------------------------------------------------------------------------------------------------------------------------------------------------------------------------------------------------------------------------------------|
| Zhou<br>China<br>June 2016                                        | 6 RCTs; 9 prospective cohort; 4 nested case-control; 2 cross-sectional; 2 retrospective cohort; 1 case-control<br><br>28,391 (50 – 12,861) | Pregnant women without HIV infection                                                   | maternal serum 25-OHD or oral supplementation with vitamin D<br><br>Daily doses of 1,000 to 4,000 IU; weekly doses of 400 daily for 9 weeks; 50,000 for 6 weeks; one time doses starting 60,000 or 2-4 doses of 120,000 | no supplementation /placebo, or routine care (ferrous sulfate and calcium, but no vitamin D) | Preterm birth                                                                                                                                                                                                                                                                                                                                               |
| Qin<br>China<br>August 2015                                       | 4 Prospective cohort; 4 Nested case-control; 1 case-control; 1 Retrospective cohort; 1 Cross-sectional<br><br>20,608 (134 – 12,861)        | Pregnant women without pre-chronic disease or HIV infection, with singleton gestation  | NR; measurement of maternal vitamin D levels                                                                                                                                                                            |                                                                                              | Preterm birth                                                                                                                                                                                                                                                                                                                                               |
| Lu<br>China<br>February 2015                                      | 4 Case-control; 7 Cohort; 2 Cross sectional; 7 Nested case control<br><br>16,515 (122 – 4,090)                                             | NR                                                                                     | NR; measurement of maternal vitamin D levels                                                                                                                                                                            |                                                                                              | Gestational diabetes                                                                                                                                                                                                                                                                                                                                        |
| De-Regil / Palacios<br>Switzerland / Puerto Rico<br>February 2015 | 15 RCTs<br><br>2,833 (40 – 990)                                                                                                            | Pregnant women of any gestational age, parity (number of births) and number of fetuses | Vitamin D daily doses: 200 - 2000<br><br>Vitamin D single dose: 200,000 – 600,000, and 35,000                                                                                                                           | No intervention / placebo                                                                    | Primary: pre-eclampsia, gestational diabetes, vitamin D concentration, adverse effects, preterm birth, low birthweight<br><br>Secondary: impaired glucose tolerance, c-section, gestational hypertension, maternal death, birth length, head circumference at birth, birthweight, admission to special care, stillbirth, neonatal death, very preterm birth |

| <b>First Author</b><br><b>Country</b><br><b>Last assessed up-to-date</b> | <b>Number of studies</b><br><b>Sample size (range)</b>                                           | <b>Population</b>                                                                                                                                                          | <b>Intervention</b><br><b>Doses in IU</b>                                                                                                                                                                                                                               | <b>Comparison</b>                                                    | <b>Outcomes for which data are reported</b>                                                                                                                                         |
|--------------------------------------------------------------------------|--------------------------------------------------------------------------------------------------|----------------------------------------------------------------------------------------------------------------------------------------------------------------------------|-------------------------------------------------------------------------------------------------------------------------------------------------------------------------------------------------------------------------------------------------------------------------|----------------------------------------------------------------------|-------------------------------------------------------------------------------------------------------------------------------------------------------------------------------------|
| Newberry<br>USA<br>September 2014                                        | 2 RCTs; 2 prospective cohorts; 5 nested case-control<br>4,912 (160 – 1,141)                      | Primary population of interest is generally healthy people with no known disorders<br><br>Only including studies for population contributing to pregnancy related outcomes | Vitamin D single doses (for RCT): 2000, 4000 followed by 1 month run-in at 2000                                                                                                                                                                                         | All participants enrolled into one of two vitamin D groups           | Preeclampsia, preterm birth, small for gestational age                                                                                                                              |
| Perez-Lopez<br>Spain<br>March 2014                                       | 13 RCTs<br>2,299 (40 – 400)                                                                      | Pregnant women of any gestational or chronologic age and parity, without previous disease history                                                                          | Vitamin D alone vs. no treatment (placebo); vitamin D + calcium vs. no treatment (placebo); and vitamin D + calcium vs. calcium<br><br>Daily doses ranged from 400 to 1,000; weekly doses ranged from 35,000 to 50,000; and single doses ranged from 200,000 to 600,000 | Active controls, usual treatment without active control, and placebo | Primary: circulating 25-OHD, preeclampsia, gestational diabetes, small for gestational age, low birth weight, preterm birth, birthweight<br><br>Secondary: birth length, c-section, |
| Wei<br>Canada<br>October 2012                                            | 13 Case-control; 8 cohort; 2 cross-sectional<br>12,898 (95 – 3,730)                              | Pregnant women without pre-existing chronic disease or HIV infection                                                                                                       | NR; measurement of maternal vitamin D levels                                                                                                                                                                                                                            |                                                                      | Preeclampsia, gestational diabetes, preterm birth, small for gestational age                                                                                                        |
| Harvey<br>UK<br>June 2012                                                | 17 Case-control; 48 cohort/cross-sectional; 9 RCT; 2 intervention studies (non-randomized)<br>NR | Pregnant women or pregnant women and their offspring                                                                                                                       | vitamin D status [dietary intake, sunlight exposure, circulating 25(OH)D concentration] or supplementation of                                                                                                                                                           | For intervention studies: no intervention or placebo                 | Primary: neonatal hypocalcaemia, rickets in the offspring, offspring bone mass and maternal osteomalacia<br><br>Secondary: offspring body composition; offspring preterm birth      |

| <b>First Author</b><br><b>Country</b><br><b>Last assessed up-to-date</b> | <b>Number of studies</b><br><b>Sample size (range)</b>          | <b>Population</b>                                | <b>Intervention</b><br><b>Doses in IU</b>                                                                            | <b>Comparison</b> | <b>Outcomes for which data are reported</b>                                                                                           |
|--------------------------------------------------------------------------|-----------------------------------------------------------------|--------------------------------------------------|----------------------------------------------------------------------------------------------------------------------|-------------------|---------------------------------------------------------------------------------------------------------------------------------------|
|                                                                          |                                                                 |                                                  | participants with vitamin D or food containing vitamin D (e.g. oily fish)                                            |                   | and later offspring health outcomes; maternal quality of life                                                                         |
| Tabesh<br>Iran<br>December 2012                                          | 2 Cohort; 4 cross-sectional; 9 case-control<br>2,936 (32 – 697) | Normal pregnant women                            | NR; measurement of maternal vitamin D levels                                                                         |                   | Preeclampsia                                                                                                                          |
| Chung<br>USA<br>April 2009                                               | 60 RCT; 3 NRCT; 102 cohort or nested case-control; 11 SR<br>NR  | Generally healthy people with no known disorders | Vitamin D supplements (no analogues), calcium supplements, and combinations of supplements; food based interventions | NR                | Pregnancy-related: preeclampsia, high blood pressure with or without proteinuria, preterm birth or low birth weight, infant mortality |
