# Supplementary material for: Vitamin D supplementation to improve pregnancy and perinatal outcomes: an overview of 42 systematic reviews
Source: PubMed Central journal article supplement — BMJ Open. 2020 Jan 20;10(1):e032626. doi: 10.1136/bmjopen-2019-032626 (PMC7044866; doi:10.1136/bmjopen-2019-032626), 2020-01-20
Supplement: bmjopen-2019-032626supp004.pdf [file bmjopen-2019-032626supp004.pdf]

**Supplementary Table 4. AMSTAR score by category and individual systematic review**

| Review                                | AMSTAR question             |                                                  |                                    |                                              |                                                   |                                                     |                       |                             |                                        |                               |                                 | Total |
|---------------------------------------|-----------------------------|--------------------------------------------------|------------------------------------|----------------------------------------------|---------------------------------------------------|-----------------------------------------------------|-----------------------|-----------------------------|----------------------------------------|-------------------------------|---------------------------------|-------|
|                                       | Q1 A priori design provided | Q2 Duplicate study selection and data extraction | Q3 Comprehensive literature search | Q4 Publication status as inclusion criterion | Q5 List of studies (include and exclude) provided | Q6 Characteristics of the included studies provided | Q7 Quality assessment | Q8 Quality used appropriate | Q9 Methods used to combine appropriate | Q10 Publication bias assessed | Q11 Conflict of interest stated |       |
| <b>OVERALL HIGH QUALITY</b>           |                             |                                                  |                                    |                                              |                                                   |                                                     |                       |                             |                                        |                               |                                 |       |
| Bi 2018                               | n                           | y                                                | y                                  | n                                            | n                                                 | y                                                   | y                     | y                           | y                                      | y                             | y                               | 8     |
| Christensen 2017                      | y                           | y                                                | y                                  | y                                            | n                                                 | y                                                   | y                     | y                           | y                                      | n                             | y                               | 9     |
| Chung 2009                            | y                           | ca                                               | y                                  | y                                            | y                                                 | y                                                   | y                     | y                           | y                                      | ca                            | y                               | 9     |
| De-Regil 2016                         | y                           | y                                                | y                                  | y                                            | y                                                 | y                                                   | y                     | y                           | y                                      | y                             | y                               | 11    |
| Harvey 2014                           | y                           | y                                                | y                                  | y                                            | n                                                 | y                                                   | y                     | y                           | y                                      | ca                            | y                               | 9     |
| Khaing 2017                           | y                           | y                                                | n                                  | n                                            | n                                                 | y                                                   | y                     | y                           | y                                      | y                             | y                               | 8     |
| Lu 2016                               | y                           | y                                                | y                                  | n                                            | n                                                 | y                                                   | y                     | y                           | y                                      | y                             | y                               | 9     |
| Newberry 2014                         | y                           | ca                                               | y                                  | n                                            | y                                                 | y                                                   | y                     | y                           | y                                      | ca                            | y                               | 8     |
| Palacios 2016                         | y                           | y                                                | y                                  | y                                            | y                                                 | y                                                   | y                     | y                           | y                                      | y                             | y                               | 11    |
| Perez-Lopez 2015                      | y                           | y                                                | y                                  | y                                            | n                                                 | y                                                   | y                     | y                           | ca                                     | ca                            | y                               | 8     |
| Qin 2016                              | n                           | y                                                | y                                  | n                                            | n                                                 | y                                                   | y                     | y                           | y                                      | y                             | y                               | 8     |
| Roth 2017                             | y                           | y                                                | y                                  | y                                            | n                                                 | y                                                   | y                     | y                           | y                                      | ca                            | y                               | 9     |
| Tabesh 2013                           | y                           | y                                                | y                                  | y                                            | n                                                 | y                                                   | n                     | n                           | y                                      | y                             | y                               | 8     |
| Wei 2013                              | n                           | y                                                | y                                  | n                                            | n                                                 | y                                                   | y                     | y                           | y                                      | y                             | y                               | 8     |
| Yepes-Nunez 2017                      | n                           | y                                                | y                                  | y                                            | y                                                 | y                                                   | y                     | y                           | y                                      | y                             | y                               | 10    |
| Zhang 2017                            | n                           | y                                                | y                                  | n                                            | n                                                 | y                                                   | y                     | y                           | y                                      | y                             | y                               | 8     |
| Zhou 2017                             | n                           | y                                                | y                                  | n                                            | n                                                 | y                                                   | y                     | y                           | y                                      | y                             | y                               | 8     |
| <b>OVERALL MEDIUM AND LOW QUALITY</b> |                             |                                                  |                                    |                                              |                                                   |                                                     |                       |                             |                                        |                               |                                 |       |
| Aghajafari 2013                       | n                           | y                                                | y                                  | ca                                           | n                                                 | y                                                   | n                     | ca                          | y                                      | y                             | n                               | 5     |
| Amegah 2017                           | n                           | y                                                | y                                  | n                                            | n                                                 | y                                                   | y                     | y                           | y                                      | y                             | n                               | 6     |
| Amraei 2018                           | ca                          | y                                                | y                                  | n                                            | n                                                 | y                                                   | ca                    | ca                          | y                                      | y                             | y                               | 6     |
| Arain 2015                            | n                           | y                                                | ca                                 | n                                            | n                                                 | y                                                   | n                     | ca                          | ca                                     | n                             | n                               | 2     |
| Chen 2017                             | n                           | y                                                | y                                  | n                                            | n                                                 | y                                                   | y                     | y                           | y                                      | y                             | n                               | 6     |
| Christensen 2012                      | n                           | y                                                | n                                  | n                                            | n                                                 | y                                                   | n                     | n                           | n                                      | n                             | y                               | 3     |
| Fu 2017                               | n                           | ca                                               | y                                  | n                                            | n                                                 | n                                                   | n                     | n                           | y                                      | y                             | y                               | 4     |
| Galthen-Sorensen 2014                 | n                           | y                                                | y                                  | n                                            | n                                                 | y                                                   | y                     | y                           | n                                      | n                             | n                               | 5     |
| Hu 2018                               | n                           | y                                                | y                                  | y                                            | n                                                 | y                                                   | n                     | ca                          | y                                      | y                             | y                               | 7     |
| Hypponen 2014                         | n                           | ca                                               | y                                  | n                                            | n                                                 | y                                                   | ca                    | n                           | y                                      | y                             | y                               | 5     |
| Kamudoni 2016                         | n                           | ca                                               | y                                  | y                                            | n                                                 | y                                                   | n                     | n                           | n                                      | n                             | y                               | 4     |
| Mahomed 2009                          | y                           | n                                                | y                                  | y                                            | y                                                 | y                                                   | ca                    | ca                          | n                                      | n                             | y                               | 6     |
| Martinez-Dominquez 2018               | n                           | ca                                               | y                                  | n                                            | n                                                 | y                                                   | y                     | ca                          | y                                      | y                             | y                               | 6     |
| Nassar 2011                           | y                           | ca                                               | n                                  | n                                            | n                                                 | y                                                   | n                     | n                           | y                                      | n                             | y                               | 4     |

|                    |   |    |   |    |   |   |    |    |    |    |   |   |
|--------------------|---|----|---|----|---|---|----|----|----|----|---|---|
| Poel 2012          | n | ca | y | n  | n | y | n  | n  | ca | y  | y | 4 |
| Purswani 2017      | n | y  | n | n  | n | y | n  | y  | y  | n  | y | 5 |
| Santamaria 2018    | n | y  | n | n  | n | y | y  | y  | y  | ca | y | 6 |
| Senti 2012         | n | y  | y | n  | n | y | n  | n  | n  | n  | y | 4 |
| Serrano-Diaz 2018  | n | n  | y | y  | n | y | ca | n  | y  | y  | y | 6 |
| Thorne-Lyman 2012  | n | n  | y | n  | n | y | y  | y  | y  | n  | n | 5 |
| Van der Pligt 2018 | n | y  | y | n  | n | y | y  | y  | n  | n  | y | 6 |
| Wei 2016           | n | y  | y | n  | n | y | y  | ca | y  | y  | n | 6 |
| Yang 2015          | n | y  | y | n  | y | y | y  | n  | y  | y  | n | 7 |
| Zhang 2018         | n | ca | y | ca | n | y | y  | y  | y  | y  | y | 7 |
| Zhang 2015         | n | n  | y | n  | n | y | y  | y  | y  | y  | y | 7 |

\* One point was awarded for each item that scored 'yes' (y) and summed for the total score

\* 'n' no; 'ca' can't answer
