# Supplementary material for: Vitamin D supplementation to improve pregnancy and perinatal outcomes: an overview of 42 systematic reviews
Source: PubMed Central journal article supplement — BMJ Open. 2020 Jan 20;10(1):e032626. doi: 10.1136/bmjopen-2019-032626 (PMC7044866; doi:10.1136/bmjopen-2019-032626), 2020-01-20
Supplement: bmjopen-2019-032626supp005.pdf [file bmjopen-2019-032626supp005.pdf]

## Supplementary Table 5: GRADE tables

## Grade Assessments for Preterm Birth in RCT's

| # studies<br>Author    | Study design | Risk of bias | Inconsistency | Indirectness | Imprecision | Other considerations                       | Overall Certainty |
|------------------------|--------------|--------------|---------------|--------------|-------------|--------------------------------------------|-------------------|
| 11<br>Bi               | RCT          | serious      | not serious   | not serious  | not serious | none                                       | moderate          |
| 3<br>De-Regil/Palacios | RCT          | serious      | not serious   | not serious  | serious     | potential for publication / reporting bias | very low          |
| 3<br>Perez-Lopez       | RCT          | serious      | not serious   | not serious  | serious     | potential for publication / reporting bias | very low          |
| 14<br>Roth             | RCT          | not serious  | not serious   | not serious  | not serious | none                                       | high              |
| 6<br>Zhou              | RCT          | not serious  | not serious   | not serious  | serious     | potential for publication / reporting bias | low               |

## Grade Assessments for Preeclampsia in RCT's

| # studies<br>Author      | Study design | Risk of bias | Inconsistency | Indirectness | Imprecision | Other considerations                       | Overall Certainty |
|--------------------------|--------------|--------------|---------------|--------------|-------------|--------------------------------------------|-------------------|
| 2<br>De-Regil / Palacios | RCT          | serious      | not serious   | not serious  | serious     | potential for publication / reporting bias | very low          |
| 3<br>Khaing              | RCT          | serious      | not serious   | not serious  | serious     | potential for publication / reporting bias | very low          |
| 1<br>Newberry            | RCT          | serious      | serious       | not serious  | serious     | potential for publication / reporting bias | very low          |
| 3<br>Perez-Lopex         | RCT          | not serious  | not serious   | not serious  | serious     | potential for publication / reporting bias | low               |
| 3<br>Roth                | RCT          | serious      | serious       | not serious  | serious     | potential for publication / reporting bias | very low          |

## Grade Assessments for Gestational Diabetes in RCT's

| # studies<br>Author | Study design | Risk of bias | Inconsistency | Indirectness | Imprecision | Other considerations                       | Overall Certainty |
|---------------------|--------------|--------------|---------------|--------------|-------------|--------------------------------------------|-------------------|
| 2<br>De-Regil       | RCT          | serious      | not serious   | not serious  | serious     | potential for publication / reporting bias | very low          |
| 3<br>Perez-Lopez    | RCT          | serious      | not serious   | not serious  | serious     | potential for publication / reporting bias | very low          |
| 5<br>Roth           | RCT          | serious      | not serious   | not serious  | serious     | potential for publication / reporting bias | very low          |

### Grade Assessments for Low Birth Weight in RCT's

| # studies<br>Author        | Study design | Risk of bias | Inconsistency | Indirectness | Imprecision | Other considerations                       | Overall Certainty |
|----------------------------|--------------|--------------|---------------|--------------|-------------|--------------------------------------------|-------------------|
| 4<br>Bi                    | RCT          | serious      | serious       | not serious  | serious     | none                                       | very low          |
| 3<br>De-Regil/<br>Palacios | RCT          | serious      | not serious   | not serious  | serious     | potential for publication / reporting bias | very low          |
| 4<br>Perez-Lopez           | RCT          | serious      | not serious   | not serious  | serious     | potential for publication / reporting bias | very low          |
| 7<br>Roth                  | RCT          | not serious  | not serious   | not serious  | serious     | potential for publication / reporting bias | low               |

### Grade Assessments for Small for Gestational Age in RCT's

| # studies<br>Author | Study design | Risk of bias | Inconsistency | Indirectness | Imprecision | Other considerations                       | Overall Certainty |
|---------------------|--------------|--------------|---------------|--------------|-------------|--------------------------------------------|-------------------|
| 6<br>Bi             | RCT          | serious      | not serious   | not serious  | serious     | none                                       | low               |
| 2<br>Harvey         | RCT          | serious      | serious       | not serious  | serious     | none                                       | very low          |
| 3<br>Perez-Lopez    | RCT          | serious      | not serious   | not serious  | serious     | potential for publication / reporting bias | very low          |
| 5<br>Roth           | RCT          | serious      | not serious   | not serious  | serious     | potential for publication / reporting bias | very low          |

**Grade Assessments for Still Birth in RCT's**

| # studies<br>Author        | Study design | Risk of bias | Inconsistency | Indirectness | Imprecision | Other considerations                             | Overall Certainty |
|----------------------------|--------------|--------------|---------------|--------------|-------------|--------------------------------------------------|-------------------|
| 3<br>De-Regil/<br>Palacios | RCT          | not serious  | not serious   | not serious  | serious     | potential for<br>publication /<br>reporting bias | low               |
| 16<br>Roth                 | RCT          | not serious  | not serious   | not serious  | not serious | none                                             | high              |

**Grade Assessments for C-Section Age in RCT's**

| # studies<br>Author        | Study design | Risk of bias | Inconsistency | Indirectness | Imprecision | Other considerations                             | Overall Certainty |
|----------------------------|--------------|--------------|---------------|--------------|-------------|--------------------------------------------------|-------------------|
| 2<br>De-Regil/<br>Palacios | RCT          | not serious  | not serious   | not serious  | serious     | potential for<br>publication /<br>reporting bias | low               |
| 4<br>Perez-Lopez           | RCT          | not serious  | not serious   | not serious  | serious     | potential for<br>publication /<br>reporting bias | low               |
| 16<br>Roth                 | RCT          | not serious  | not serious   | not serious  | not serious | none                                             | high              |

**Grade Assessments for Preterm Birth in Observational Studies**

| # studies<br>Author                               | Study design | Risk of bias | Inconsistency | Indirectness | Imprecision | Other considerations                             | Overall Certainty |
|---------------------------------------------------|--------------|--------------|---------------|--------------|-------------|--------------------------------------------------|-------------------|
| 7<br>Harvey                                       | OBS          | not serious  | serious       | serious      | serious     | potential for<br>publication /<br>reporting bias | very low          |
| 2<br>Newberry                                     | OBS          | not serious  | serious       | serious      | serious     | potential for<br>publication /<br>reporting bias | very low          |
| 10<br>Qin                                         | OBS          | not serious  | not serious   | serious      | not serious | none                                             | moderate          |
| 4<br>Wei<br>[blood level<br>25(OH)D<br><50nmol/L] | OBS          | not serious  | not serious   | serious      | serious     | potential for<br>publication /<br>reporting bias | very low          |

|                                                     |     |             |             |         |             |                                                  |          |
|-----------------------------------------------------|-----|-------------|-------------|---------|-------------|--------------------------------------------------|----------|
| 4<br>Wei<br>[blood level<br>25(OH)D<br><75nmol/L]   | OBS | not serious | not serious | serious | serious     | potential for<br>publication /<br>reporting bias | very low |
| 16<br>Zhou<br>[blood level<br>25(OH)D<br><50nmol/L] | OBS | not serious | not serious | serious | not serious | none                                             | moderate |
| 17<br>Zhou<br>[blood level<br>25(OH)D<br><75nmol/L] | OBS | not serious | serious     | serious | not serious | none                                             | low      |

#### Grade Assessments for Preeclampsia in Observational Studies

| # studies<br>Author                               | Study design | Risk of bias | Inconsistency | Indirectness | Imprecision | Other<br>considerations                          | Overall Certainty |
|---------------------------------------------------|--------------|--------------|---------------|--------------|-------------|--------------------------------------------------|-------------------|
| 1<br>Chung                                        | OBS          | not serious  | serious       | serious      | serious     | potential for<br>publication /<br>reporting bias | very low          |
| 4<br>Harvey                                       | OBS          | not serious  | serious       | serious      | serious     | potential for<br>publication /<br>reporting bias | very low          |
| 8<br>Newberry                                     | OBS          | not serious  | serious       | serious      | serious     | potential for<br>publication /<br>reporting bias | very low          |
| 8<br>Tabesh                                       | OBS          | serious      | serious       | serious      | not serious | none                                             | very low          |
| 6<br>Wei<br>[blood level<br>25(OH)D<br><50nmol/L] | OBS          | not serious  | not serious   | serious      | not serious | potential for<br>publication /<br>reporting bias | low               |
| 5<br>Wei<br>[blood level<br>25(OH)D<br><75nmol/L] | OBS          | not serious  | serious       | serious      | not serious | potential for<br>publication /<br>reporting bias | very low          |

**Grade Assessments for Gestational Diabetes in Observational Studies**

| # studies<br>Author                                | Study design | Risk of bias | Inconsistency | Indirectness | Imprecision | Other considerations                       | Overall Certainty |
|----------------------------------------------------|--------------|--------------|---------------|--------------|-------------|--------------------------------------------|-------------------|
| 8<br>Harvey                                        | OBS          | not serious  | serious       | serious      | serious     | potential for publication / reporting bias | very low          |
| 20<br>Lu                                           | OBS          | not serious  | serious       | serious      | not serious | none                                       | low               |
| 10<br>Wei<br>[blood level<br>25(OH)D<br><50nmol/L] | OBS          | not serious  | not serious   | serious      | not serious | none                                       | moderate          |
| 8<br>Wei<br>[blood level<br>25(OH)D<br><75nmol/L]  | OBS          | not serious  | not serious   | serious      | not serious | none                                       | moderate          |

**Grade Assessments for Low Birth Weight in Observational Studies**

| # studies<br>Author | Study design | Risk of bias | Inconsistency | Indirectness | Imprecision | Other considerations                       | Overall Certainty |
|---------------------|--------------|--------------|---------------|--------------|-------------|--------------------------------------------|-------------------|
| 3<br>Harvey         | OBS          | not serious  | serious       | serious      | serious     | potential for publication / reporting bias | very low          |

**Grade Assessments for Small for Gestational Age in Observational Studies**

| # studies<br>Author | Study design | Risk of bias | Inconsistency | Indirectness | Imprecision | Other considerations                       | Overall Certainty |
|---------------------|--------------|--------------|---------------|--------------|-------------|--------------------------------------------|-------------------|
| 7<br>Harvey         | OBS          | not serious  | serious       | serious      | serious     | potential for publication / reporting bias | very low          |
| 1<br>Newberry       | OBS          | not serious  | serious       | serious      | serious     | potential for publication / reporting bias | very low          |
| 6<br>Wei            | OBS          | not serious  | not serious   | serious      | not serious | potential for publication / reporting bias | low               |

|                                                   |     |             |         |         |             |                                                  |          |
|---------------------------------------------------|-----|-------------|---------|---------|-------------|--------------------------------------------------|----------|
| [blood level<br>25(OH)D<br><50nmol/L]             |     |             |         |         |             |                                                  |          |
| 5<br>Wei<br>[blood level<br>25(OH)D<br><75nmol/L] | OBS | not serious | serious | serious | not serious | potential for<br>publication /<br>reporting bias | very low |

### Grade Assessments for Small for C-Section in Observational Studies

| # studies<br>Author | Study design | Risk of bias | Inconsistency | Indirectness | Imprecision | Other<br>considerations                          | Overall Certainty |
|---------------------|--------------|--------------|---------------|--------------|-------------|--------------------------------------------------|-------------------|
| 3<br>Harvey         | OBS          | not serious  | serious       | serious      | serious     | potential for<br>publication /<br>reporting bias | very low          |
